# Supplementary material for: Detecting Key Structural Features within Highly Recombined Genes
Source: PLOS journal article supplement (doi:10.1371/journal.pcbi.0030014), 2007-01-24

Figure S1

**A) Multiple alignment of 139 unique *sof* partial alleles aligned using ClustalW**

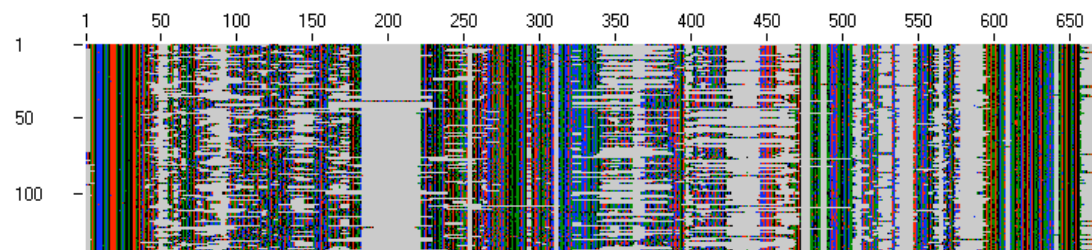

**B) Multiple alignment of 139 unique *sof* partial alleles aligned using MAFFT**

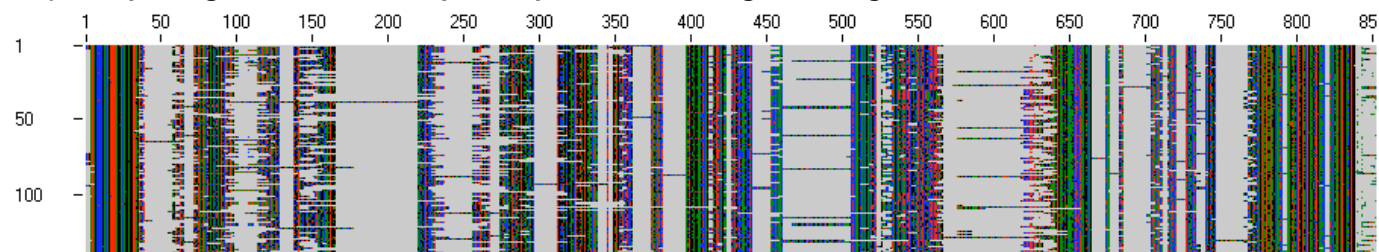

**C) Multiple alignment of 139 unique *sof* partial alleles aligned using MUSCLE**

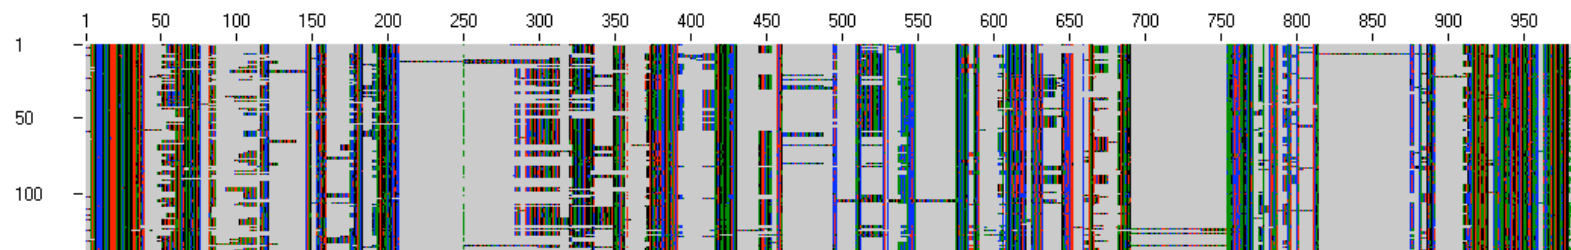

**D) Multiple alignment of 41 unique *pbp2x* partial alleles aligned using ClustalW**

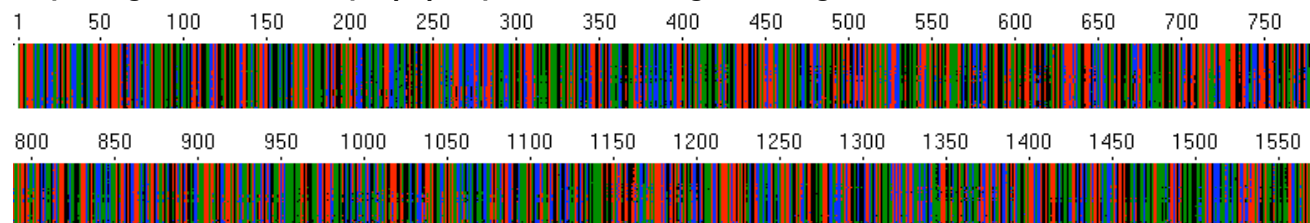

Supplement: S1 (10.1371/journal.pcbi.0030014.s001) [file journal.pcbi.0030014.s001]
