# Supplementary material for: Detecting Key Structural Features within Highly Recombined Genes
Source: PLOS journal article supplement (doi:10.1371/journal.pcbi.0030014), 2007-01-24

Figure S2

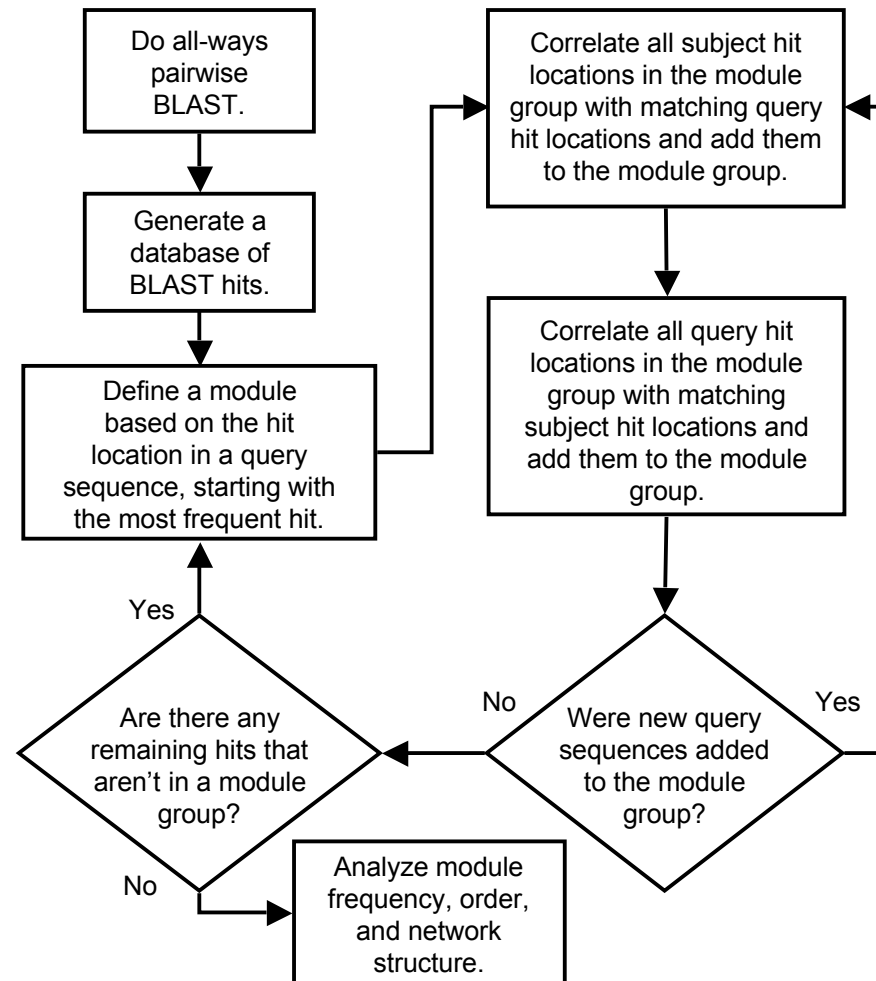

Supplement: S2 (10.1371/journal.pcbi.0030014.s002) [file journal.pcbi.0030014.s002]
