# Supplementary material for: Detecting Key Structural Features within Highly Recombined Genes
Source: PLOS journal article supplement (doi:10.1371/journal.pcbi.0030014), 2007-01-24

Figure S4

**A module based phenogram of *pbp2x* mapped to antibiotic resistance phenotype**

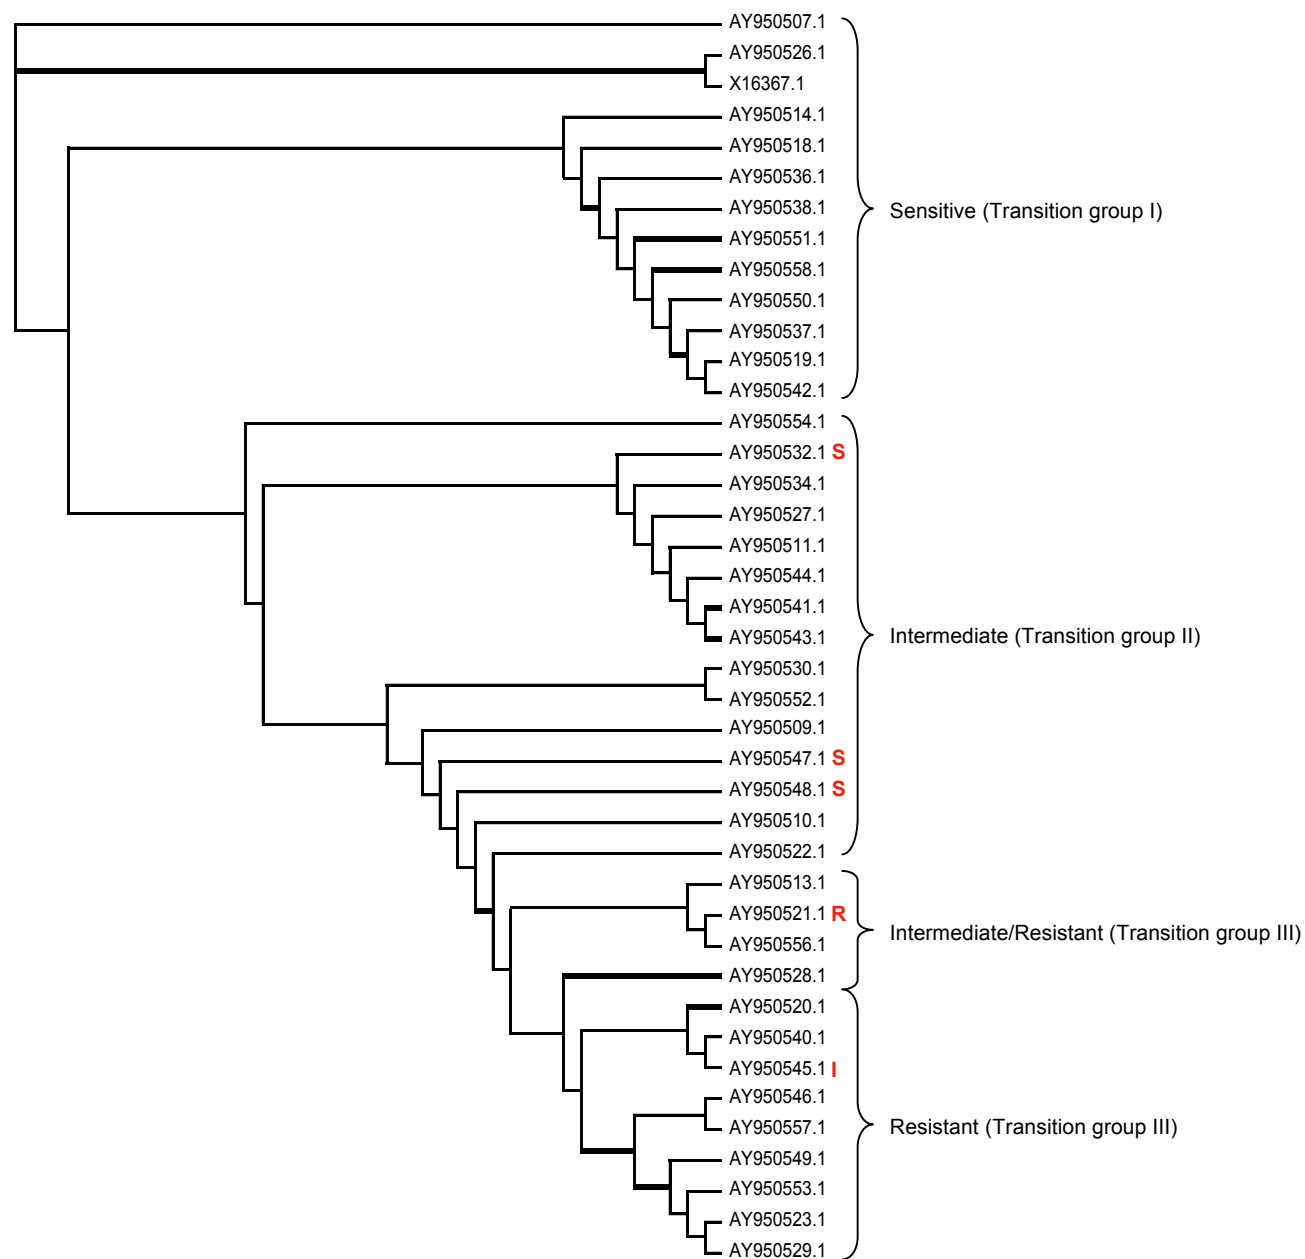

Supplement: S4 (10.1371/journal.pcbi.0030014.s004) [file journal.pcbi.0030014.s004]
