# Supplementary material for: Detecting Key Structural Features within Highly Recombined Genes
Source: PLOS journal article supplement (doi:10.1371/journal.pcbi.0030014), 2007-01-24

Figure S5

A) Network path of *sof* allele AF139751.1

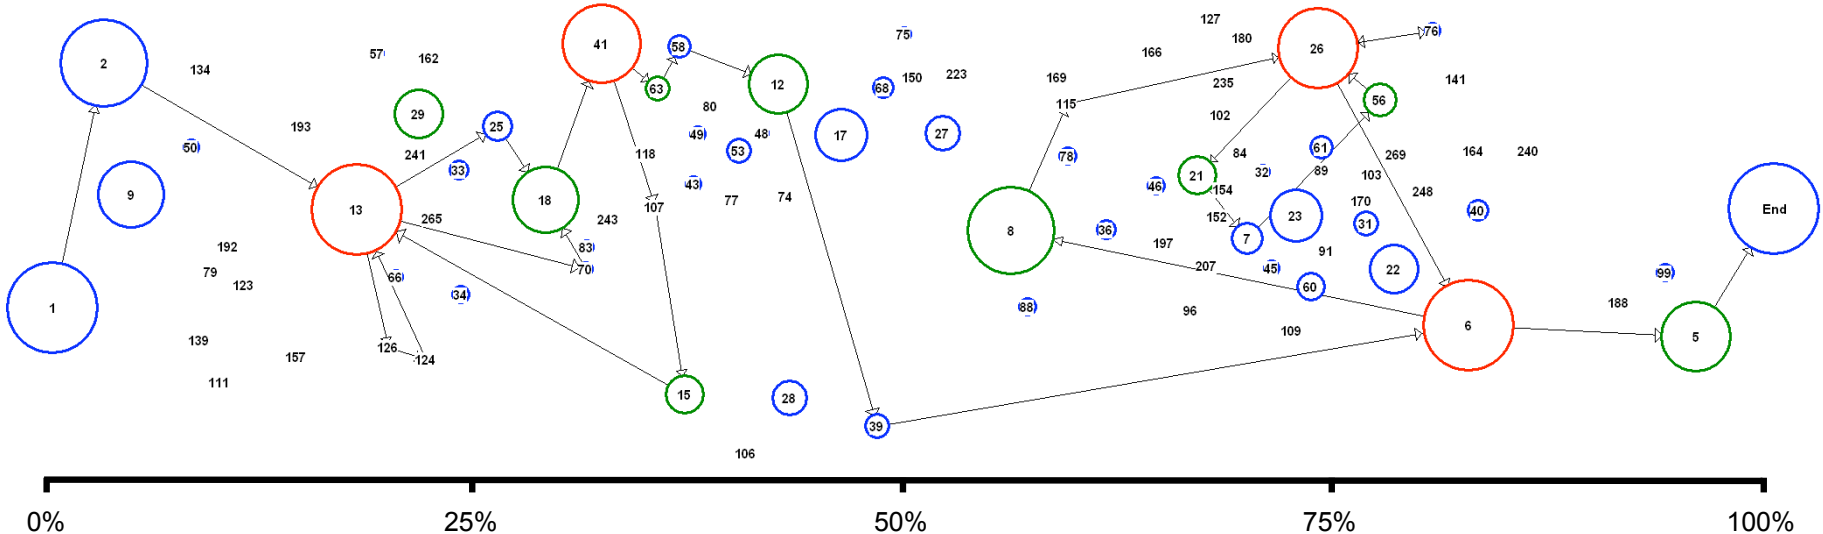

B) Network path of *sof* allele AF138799.1

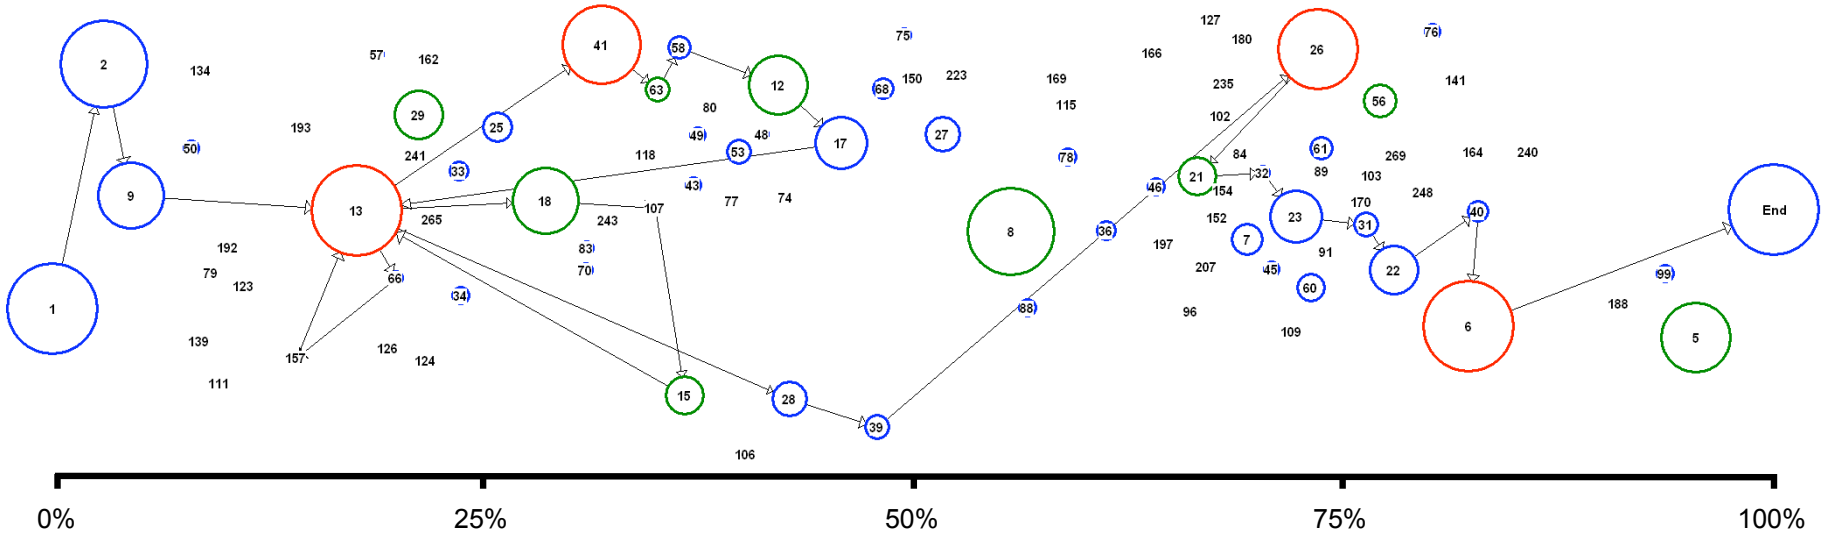

Supplement: S5 (10.1371/journal.pcbi.0030014.s005) [file journal.pcbi.0030014.s005]
