# Supplementary material for: Detecting Key Structural Features within Highly Recombined Genes
Source: PLoS Comput Biol. 2007 Jan 26;3(1):e14. doi: 10.1371/journal.pcbi.0030014 (PMC1782043; doi:10.1371/journal.pcbi.0030014)
Supplement: Table S2 — (27 KB XLS) [file pcbi.0030014.st002.xls]

## Sheet: Table S2
Table S2: Frequency and distribution of modules corresponding to sof alleles
Module designation	Number of iterations that define each module	Number of occurrences of each module in entire dataset	Number of sof alleles with multiple occurrences of a module	Number of sof alleles harboring each module
End	NA	NA	NA	139
13	19	716	138	139
6	28	583	137	139
1	2	149	10	139
8	8	225	88	135
2	2	134		134
26	13	249	83	123
41	13	169	44	120
5	6	154	48	106
18	7	153	52	101
9	2	101		101
12	7	148	60	88
23	4	79		79
17	3	77		77
29	6	74	2	72
22	4	100	28	72
21	5	62	6	56
15	5	113	48	55
28	2	52		52
27	4	50		50
56	5	46		46
7	4	46		46
25	4	46	4	42
60	4	37		37
31	2	34		34
53	2	33		33
63	6	32		32
39	2	32		32
61	2	31		31
58	4	30		30
40	3	28		28
68	2	26		26
36	2	25		25
33	2	25		25
78	2	24		24
46	1	23		23
99	2	22		22
88	2	22		22
34	2	22		22
49	1	20		20
43	2	20		20
76	2	19		19
50	3	19		19
45	2	19		19
75	2	18		18
83	2	16		16
70	4	15		15
66	3	18	3	15
32	2	15		15
57	2	14		14
48	1	14		14
107	2	13		13
96	2	13		13
80	2	13		13
84	1	12		12
103	1	11		11
77	1	11		11
124	2	10		10
115	1	10		10
109	3	10		10
106	1	10		10
89	1	10		10
126	2	9		9
79	1	9		9
74	1	9		9
139	2	8		8
134	1	8		8
123	1	8		8
111	1	8		8
91	1	8		8
141	1	7		7
118	1	7		7
102	1	7		7
162	1	6		6
157	1	6		6
152	2	6		6
150	1	6		6
127	1	6		6
170	1	5		5
166	1	5		5
164	2	5		5
154	1	5		5
207	1	4		4
197	1	4		4
193	1	4		4
192	1	4		4
188	1	4		4
169	1	4		4
243	1	3		3
241	1	3		3
240	1	3		3
235	1	3		3
180	1	3		3
269	1	2		2
265	1	2		2
248	1	2		2
223	1	2		2
