# Supplementary material for: Detecting Key Structural Features within Highly Recombined Genes
Source: PLoS Comput Biol. 2007 Jan 26;3(1):e14. doi: 10.1371/journal.pcbi.0030014 (PMC1782043; doi:10.1371/journal.pcbi.0030014)
Supplement: Table S3 — (28 KB XLS) [file pcbi.0030014.st003.xls]

## Sheet: Table S3
Table S3: Linkage analysis of module pairs
		Number of sof alleles harboring:		Number of sof alleles:			Statistics
Module A designation	Module B designation	Module A	Module B	Observed, for module A and B co-occurrence	Expected, for module A and B co-occurrence	Deviation from expected	Chi-squared*	p-value**
48	80	14	13	13	1.30935	11.6906	96.5518	4.04261e-19
103	89	11	10	10	0.791367	9.20863	96.3826	4.40345e-19
139	111	8	8	7	0.460432	6.53957	79.4863	2.25798e-15
43	49	20	20	17	2.8777	14.1223	65.8478	2.26514e-12
63	58	32	30	28	6.90647	21.0935	64.6156	4.23305e-12
74	48	9	14	9	0.906475	8.09353	64.028	5.70394e-12
28	15	52	55	52	20.5755	31.4245	54.5541	7.03199e-10
45	96	19	13	12	1.77698	10.223	53.8898	9.8608e-10
80	74	13	9	8	0.841727	7.15827	52.99	1.55895e-09
154	152	5	6	4	0.215827	3.78417	50.0527	6.9597e-09
192	193	4	4	3	0.115108	2.88489	49.4533	9.44667e-09
79	123	9	8	6	0.517986	5.48201	48.0962	1.88698e-08
127	235	6	3	3	0.129496	2.8705	43.4337	2.03933e-07
12	28	88	52	2	32.9209	-30.9209	36.8347	5.97887e-06
157	66	6	15	6	0.647482	5.35252	36.5369	6.96603e-06
66	157	15	6	6	0.647482	5.35252	36.5369	6.96603e-06
66	34	15	22	12	2.3741	9.6259	35.689	1.07634e-05
53	49	33	20	18	4.7482	13.2518	35.4575	1.21213e-05
152	102	6	7	4	0.302158	3.69784	33.9167	2.67485e-05
12	15	88	55	5	34.8201	-29.8201	32.9406	4.41836e-05
180	123	3	8	3	0.172662	2.82734	31.4086	9.72113e-05
39	15	32	55	32	12.6619	19.3381	30.8359	0.000130569
84	150	12	6	5	0.517986	4.48201	30.726	0.000138177
15	17	55	77	3	30.4676	-27.4676	30.5704	0.000149713
17	28	77	52	2	28.8058	-26.8058	30.3026	0.00017188
118	43	7	20	7	1.00719	5.99281	30.174	0.000183662
154	32	5	15	5	0.539568	4.46043	29.1824	0.000306321
88	36	22	25	15	3.95683	11.0432	28.9161	0.000351463
134	162	8	6	4	0.345324	3.65468	28.8915	0.00035595
248	164	2	5	2	0.0719424	1.92806	28.3633	0.000467572
28	39	52	32	30	11.9712	18.0288	28.0853	0.000539801
79	180	9	3	3	0.194245	2.80576	27.4095	0.000765473
36	89	25	10	9	1.79856	7.20144	25.2966	0.00228583
43	53	20	33	16	4.7482	11.2518	25.2074	0.00239403
157	74	6	9	4	0.388489	3.61151	24.9906	0.00267893
17	12	77	88	77	48.7482	28.2518	24.3323	0.00376973
40	32	28	15	12	3.02158	8.97842	24.3186	0.00379663
77	53	11	33	11	2.61151	8.38849	24.2848	0.00386383
60	61	37	31	22	8.2518	13.7482	22.6123	0.00921697
60	84	37	12	12	3.19424	8.80576	22.105	0.0120031
36	103	25	11	9	1.97842	7.02158	21.808	0.0140122
27	28	50	52	0	18.705	-18.705	20.4734	0.0281164
68	75	26	18	12	3.36691	8.63309	20.134	0.0335736
89	109	10	10	5	0.719424	4.28058	19.9705	0.0365697
27	15	50	55	1	19.7842	-18.7842	19.7022	0.042081
75	27	18	50	18	6.47482	11.5252	19.6907	0.0423347
192	79	4	9	3	0.258993	2.74101	19.427	0.048601
79	193	9	4	3	0.258993	2.74101	19.427	0.048601
74	83	9	16	6	1.03597	4.96403	19.3798	0.0498171
*Yates' corrected
**Bonferroni corrected for pair wise comparisons of all 97 modules
